# Supplementary material for: Health and Subjective Views on Aging: Longitudinal Findings From the ActiFE Ulm Study
Source: PubMed Central journal article supplement — J Gerontol B Psychol Sci Soc Sci. 2021 Feb 2;76(7):1349–59. doi: 10.1093/geronb/gbab023 (PMC8363042; doi:10.1093/geronb/gbab023), 2021-02-02
Supplement: gbab023_suppl_supplementary_material.pdf [file gbab023_suppl_supplementary_material.pdf]

## Supplement

## Supplementary Table 1

*Overview of Number of Missing Values Across Major Study Variables in the Total Sample**(N=526).*

| Variables       | n  | % of total |
|-----------------|----|------------|
| Age             | 0  | (0%)       |
| Sex             | 0  | (0%)       |
| BMI             | 3  | (<1%)      |
| MMSE            | 44 | (8%)       |
| $\Delta$ MMSE   | 82 | (16%)      |
| HADS            | 33 | (6%)       |
| $\Delta$ HADS   | 37 | (7%)       |
| ADL             | 3  | (<1%)      |
| $\Delta$ ADL    | 5  | (1%)       |
| Diagnoses count | 16 | (3%)       |
| ATOA            | 7  | (1%)       |
| Subj. age       | 7  | (1%)       |

*Note:*  $\Delta$  denotes change scores: follow-up – baseline. BMI= Body mass index; MMSE= Mini-mental state examination; HADS= Total score of the Hospital Anxiety and Depression Scale; ADL= Activities of daily living; Diagnoses count= Number of self-reported diagnoses; ATOA= Attitudes toward own aging, Subj. age= Subjective age as proportional score.

## Supplementary Table 2

*Descriptive Statistics for the Sample (N=502) Used in the Analyses with Subjective Age after*

*Exclusion of the Identified Outliers.*

| Variables           | n (%)     | Mean (SD)   | Median | Interquartile range<br>(Q1, Q3) | Range<br>(Min, Max) |
|---------------------|-----------|-------------|--------|---------------------------------|---------------------|
| Age                 |           | 72.71 (5.1) | 71.60  | (68.80, 75.20)                  | (65.30, 88.00)      |
| Sex male            | 288 (57%) |             |        |                                 |                     |
| Sex female          | 214 (43%) |             |        |                                 |                     |
| Education ≤ 9 years | 247 (50%) |             |        |                                 |                     |
| Education > 9 years | 250 (50%) |             |        |                                 |                     |
| BMI                 |           | 27.29 (3.6) | 26.90  | (24.80, 29.50)                  | (17.30, 42.80)      |
| MMSE                |           | 28.65 (1.5) | 29     | (28, 30)                        | (23, 30)            |
| ΔMMSE               |           | -0.48 (2.0) | 0      | (-2, 1)                         | (-6, 5)             |
| HADS                |           | 7.27 (4.7)  | 7      | (4, 10)                         | (0, 33)             |
| ΔHADS               |           | 0.97 (4.2)  | 1      | (-2, 3)                         | (-17, 15)           |
| ADL                 |           | 0.51 (1.5)  | 0      | (0, 0)                          | (0, 14)             |
| ΔADL                |           | 1.01 (2.4)  | 0      | (0, 1)                          | (-8, 17)            |
| Diagnoses count     |           | 3.53 (2.0)  | 3      | (2, 5)                          | (0, 10)             |
| ATOA                |           | 2.89 (1.6)  | 3      | (2, 4)                          | (0, 5)              |
| Subj. age           |           | -0.07 (0.1) | -0.07  | (-0.11, -0.01)                  | (-0.24, 0.06)       |

*Note:* Δ denotes change scores: follow-up – baseline. BMI= Body mass index; MMSE= Mini-mental state examination; HADS= Total score of the Hospital Anxiety and Depression Scale; ADL= Activities of daily living; Diagnoses count= Number of self-reported diagnoses; ATOA= Attitudes toward own aging, Subj. age= Subjective age as proportional score.

## Supplementary Table 3

*Descriptive Statistics of Baseline Characteristics for Participants that Were Alive During the Follow-up Period but Did not Participate (n=571).*

| Variables           | n (%)     | Mean (SD)   | Median | Interquartile range<br>(Q1, Q3) | Range<br>(Min, Max) |
|---------------------|-----------|-------------|--------|---------------------------------|---------------------|
| Age                 |           | 74.43 (6.0) | 72.60  | (69.90, 79.30)                  | (65.50, 90.90)      |
| Sex male            | 275 (48%) |             |        |                                 |                     |
| Sex female          | 296 (52%) |             |        |                                 |                     |
| Education ≤ 9 years | 332 (59%) |             |        |                                 |                     |
| Education > 9 years | 228 (41%) |             |        |                                 |                     |
| BMI                 |           | 27.88 (4.4) | 27.30  | (25.00, 30.50)                  | (17.00, 51.60)      |
| MMSE                |           | 28.06 (1.9) | 28     | (27, 29)                        | (18, 30)            |
| HADS                |           | 8.12 (5.3)  | 7      | (4, 11)                         | (0, 28)             |
| ADL                 |           | 1.02 (2.4)  | 0      | (0, 1)                          | (0, 19)             |
| Diagnoses count     |           | 3.84 (2.1)  | 4      | (2, 5)                          | (0, 10)             |

*Note:* BMI= Body mass index; MMSE= Mini-mental state examination; HADS= Total score of the Hospital Anxiety and Depression Scale; ADL= Activities of daily living; Diagnoses count= Number of self-reported diagnoses.

## Supplementary Table 4

*Zero-Order Correlations of Major Study Variables (N=526; Missing Values Handled by Full Information Maximum-Likelihood).*

| Variables          | 1    | 2    | 3    | 4    | 5    | 6    | 7    | 8    | 9    | 10   | 11 |
|--------------------|------|------|------|------|------|------|------|------|------|------|----|
| 1. Age             | -    |      |      |      |      |      |      |      |      |      |    |
| 2. Sex             | -.08 | -    |      |      |      |      |      |      |      |      |    |
| 3. HADS            | .08  | .07  | -    |      |      |      |      |      |      |      |    |
| 4. $\Delta$ HADS   | .08  | .05  | -.42 | -    |      |      |      |      |      |      |    |
| 5. ADL             | .15  | .12  | .22  | -.08 | -    |      |      |      |      |      |    |
| 6. $\Delta$ ADL    | .36  | -.05 | .14  | .09  | .04  | -    |      |      |      |      |    |
| 7. Diagnoses count | .15  | .24  | .26  | .01  | .34  | .14  | -    |      |      |      |    |
| 8. MMSE            | -.08 | .04  | -.08 | .00  | -.04 | .06  | -.03 | -    |      |      |    |
| 9. $\Delta$ MMSE   | -.11 | .05  | .00  | -.04 | .06  | -.08 | -.05 | -.53 | -    |      |    |
| 10. ATOA           | -.27 | -.04 | -.36 | -.15 | -.20 | -.29 | -.23 | .10  | -.01 | -    |    |
| 11. Subj. age      | .08  | .03  | .17  | .03  | .11  | .04  | .14  | -.07 | .04  | -.30 | -  |

*Note:*  $\Delta$  denotes change scores: follow-up – baseline. HADS = Total score of the Hospital

Anxiety and Depression Scale; ADL= Activities of daily living; Diagnoses count= Number of self-reported diagnoses; MMSE= Mini-mental state examination; ATOA= Attitudes toward own aging; Subj. age= Subjective age as proportional score.

## Supplementary Table 5

*Standardized Differences (Cohen's  $d$ ) and Associated 95% Confidence Intervals Across Study Variables Contrasting Participants with Positive Vs. Negative VoA According to ATOA and SA Groups Based on a Median-Split Procedure).*

| Variable        | ATOA positive (n=318) vs negative (n=208) |              | Subjective age young (n=384) vs. old (n=118) |              |
|-----------------|-------------------------------------------|--------------|----------------------------------------------|--------------|
|                 | Cohens's $d$                              | [95% CI]     | Cohens's $d$                                 | [95% CI]     |
| Age             | -.41                                      | [-.59. -.24] | -.25                                         | [-.46. -.04] |
| Sex             | .12                                       | [-.05. .30]  | .10                                          | [-.11. .31]  |
| MMSE            | .16                                       | [-.01. .34]  | .26                                          | [.07. .48]   |
| $\Delta$ MMSE   | .01                                       | [-.17. .18]  | -.16                                         | [-.37. .05]  |
| HADS            | -.63                                      | [-.81. -.45] | -.13                                         | [-.34. .07]  |
| $\Delta$ HADS   | -.26                                      | [-.43. -.08] | -.25                                         | [-.46. -.04] |
| ADL             | -.32                                      | [-.49. -.14] | -.31                                         | [-.52. -.11] |
| $\Delta$ ADL    | -.54                                      | [-.72. -.36] | -.35                                         | [-.55. -.14] |
| Diagnoses count | -.28                                      | [-.45. -.10] | -.23                                         | [-.44. -.03] |
| ATOA            |                                           |              | .49                                          | [.29. .70]   |
| Subj. age       | -.46                                      | [-.64. -.28] |                                              |              |

*Note:*  $\Delta$  denotes change scores: follow-up – baseline. MMSE= Mini-mental state examination; HADS= Total score of the Hospital Anxiety and Depression Scale; ADL= Activities of daily living; Diagnoses count= Number of self-reported diagnoses; ATOA= Attitudes toward own aging; Subj. age= Subjective age as proportional score.

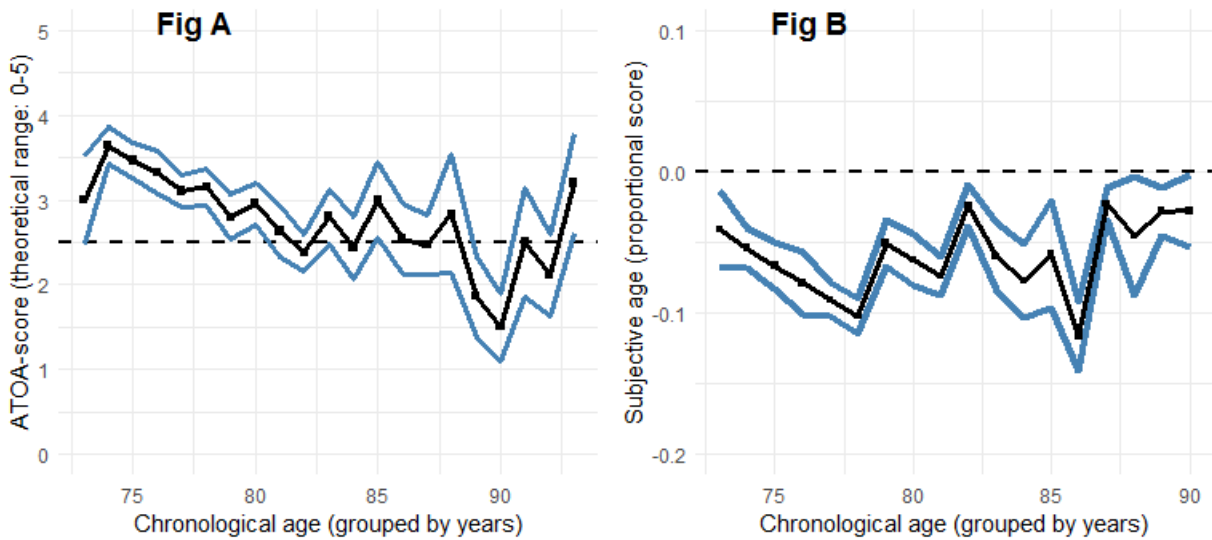

*Supplementary Figure 1.* Cross-sectional data on VoA grouped by age in years (N=526, missing data handled by pairwise deletion). A) Mean ATOA-Score (y-axis) grouped by age in years (x-axis). Blue lines indicate mean  $\pm$  1 standard error. Dashed reference line indicates theoretical mean of the scale. B) Median subjective age proportional score (y-axis) grouped by age in years (x-axis). Blue lines indicate median  $\pm$  1 standard error. Dashed reference line indicates a subjective age identical to chronological age.
